# Supplementary material for: Construction of strongly coupled 2D–2D SnS2/CdS S-scheme heterostructures for photocatalytic hydrogen evolution
Source: Royal Society of Chemistry journal article supplement (doi:10.1039/d2se01717b), 2023-01-01
Supplement: d2se01717b1.pdf [file d2se01717b1.pdf]

## Electronic Supplementary Information

### Construction of strongly coupled 2D-2D SnS<sub>2</sub>/CdS S-Scheme heterostructures for photocatalytic hydrogen evolution

Xiaoyu Chen, Zhi Han, Zonghao Lu, Tingting Qu, Ce Liang, Yu Wang, Bin Zhang\*, Xijiang Han\*,  
and Ping Xu\*

MIIT Key Laboratory of Critical Materials Technology for New Energy Conversion and Storage, School of  
Chemistry and Chemical Engineering, Harbin Institute of Technology, Harbin 150001, China. Email:  
pxu@hit.edu.cn (P.X.); hanxijiang@hit.edu.cn (X.H.); zhangbin\_hit@aliyun.com (B.Z.)

## Contents

|                  |                                                                                                                                                  |
|------------------|--------------------------------------------------------------------------------------------------------------------------------------------------|
| <b>Fig. S1</b>   | PerfectLight Labsolar 6A and PerfectLight PLS-SXE300/300UV.                                                                                      |
| <b>Fig. S2</b>   | Optical photos of CdS nanosheets, 2D-2D SnS <sub>2</sub> /CdS heterostructures and SnS <sub>2</sub> nanosheets.                                  |
| <b>Fig. S3</b>   | SEM image of pure SnS <sub>2</sub> nanosheets.                                                                                                   |
| <b>Fig. S4</b>   | Nitrogen sorption isotherms and the corresponding Barrett-Joyner-Halenda (BJH) pore size distribution plots of pure SnS <sub>2</sub> nanosheets. |
| <b>Fig. S5</b>   | XPS survey spectra of SnS <sub>2</sub> /CdS and pure CdS.                                                                                        |
| <b>Fig. S6</b>   | XPS survey spectra and S 2p XPS peaks of pure SnS <sub>2</sub> nanosheets.                                                                       |
| <b>Fig. S7</b>   | UV-vis absorption spectrum and optical band gap of pure SnS <sub>2</sub> .                                                                       |
| <b>Fig. S8</b>   | Time-resolved transient photoluminescence decay spectra of the pure SnS <sub>2</sub> nanosheets.                                                 |
| <b>Fig. S9</b>   | XRD pattern, Sn 3d XPS peaks, Cd 3d XPS peaks, and S 2p XPS peaks of SnS <sub>2</sub> /CdS heterostructures before and after reaction.           |
| <b>Fig. S10</b>  | EIS Nyquist plots, chronoamperometry curves, Mott-Schottky plots, linear sweep voltammogram curves of pure SnS <sub>2</sub> nanosheets.          |
| <b>Fig. S11</b>  | XPS valance of (a) pure CdS and (b) pure SnS <sub>2</sub> .                                                                                      |
| <b>Fig. S12</b>  | models of CdS (002), SnS <sub>2</sub> (100), and SnS <sub>2</sub> /CdS heterostructures.                                                         |
| <b>Fig. S13</b>  | charge density difference diagram of CdS (002), SnS <sub>2</sub> (100), and SnS <sub>2</sub> /CdS heterostructures.                              |
| <b>Fig. S14</b>  | charge density diagram of CdS (002), SnS <sub>2</sub> (100), and SnS <sub>2</sub> /CdS heterostructures.                                         |
| <b>Table. S1</b> | Time-resolved PL decay curve parameters obtained by double-exponential function simulation.                                                      |
| <b>Table. S2</b> | Photocatalytic hydrogen production performance (AQE) of photocatalysts reported in literatures.                                                  |

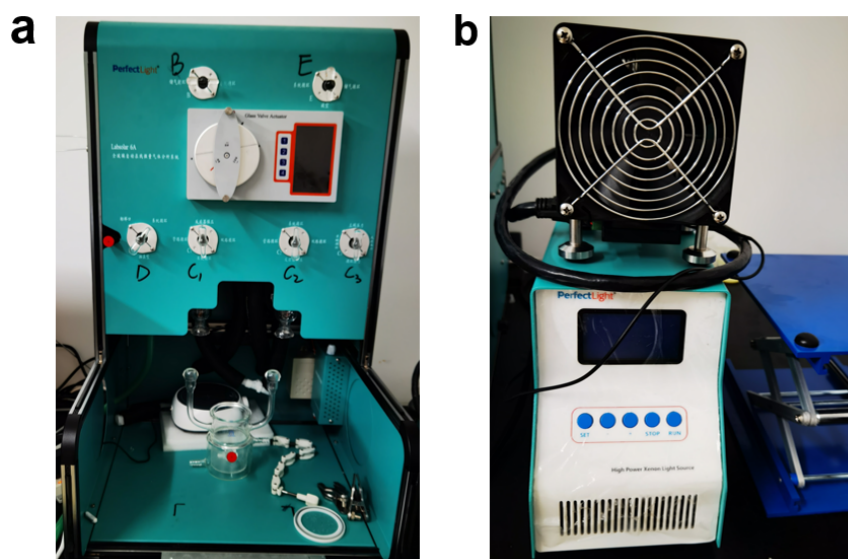

**Fig. S1.** (a) PerfectLight Labsolar 6A and (b) PerfectLight PLS-SXE300/300UV.

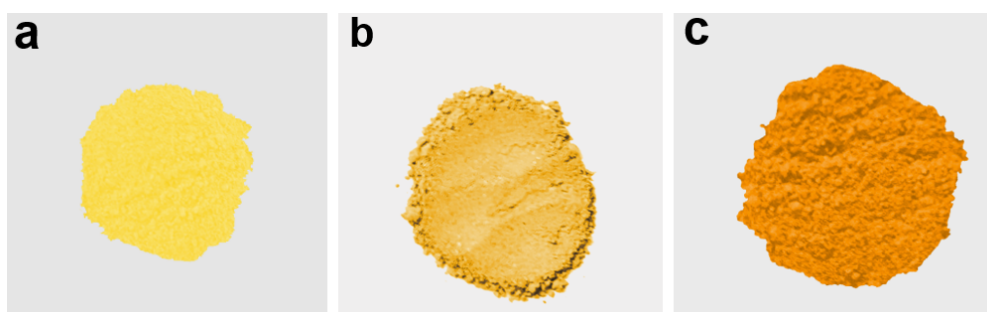

**Fig. S2.** Optical photos of (a) CdS nanosheets, (b) 2D-2D SnS<sub>2</sub>/CdS heterostructures and (c) SnS<sub>2</sub> nanosheets.

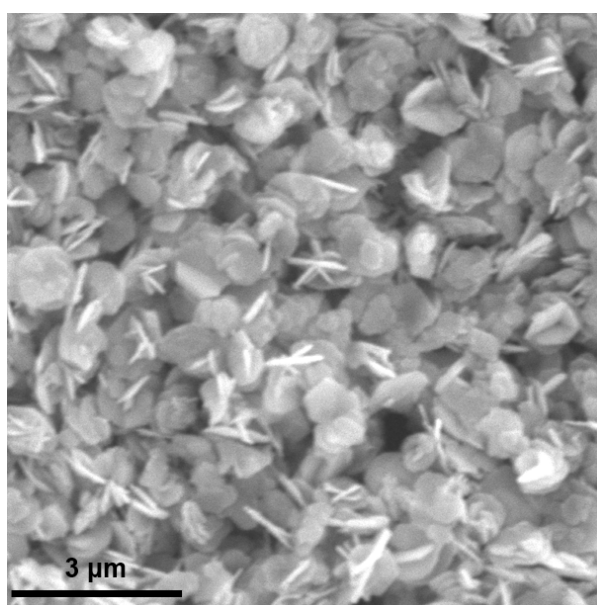

**Fig. S3.** SEM image of pure SnS<sub>2</sub> nanosheets.

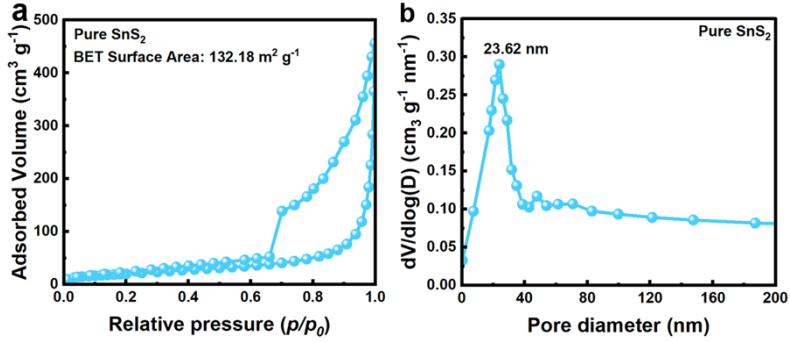

**Fig. S4.** Nitrogen sorption isotherms and the corresponding Barrett-Joyner-Halenda (BJH) pore size distribution plots of pure SnS<sub>2</sub> nanosheets.

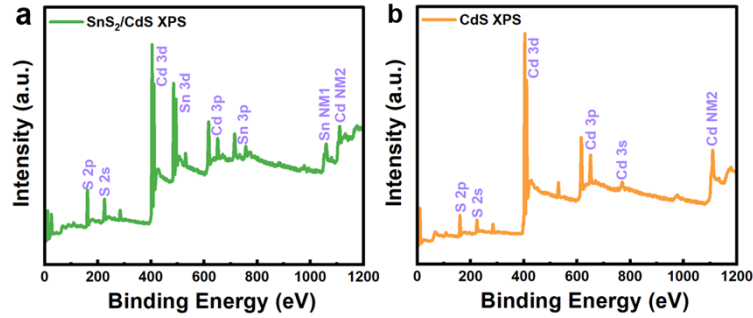

**Fig. S5.** XPS survey spectra of SnS<sub>2</sub>/CdS and pure CdS.

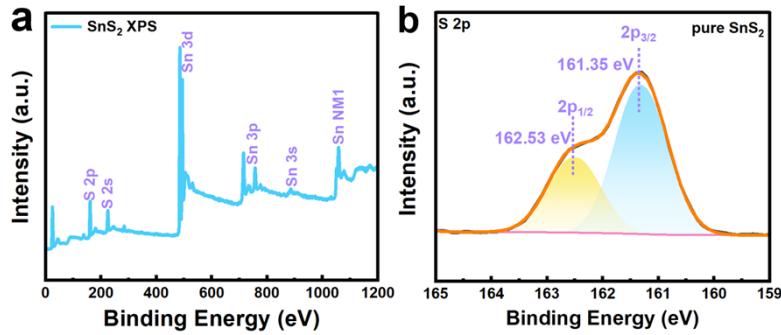

**Fig. S6.** XPS survey spectra and S 2p XPS peaks of pure SnS<sub>2</sub> nanosheets.

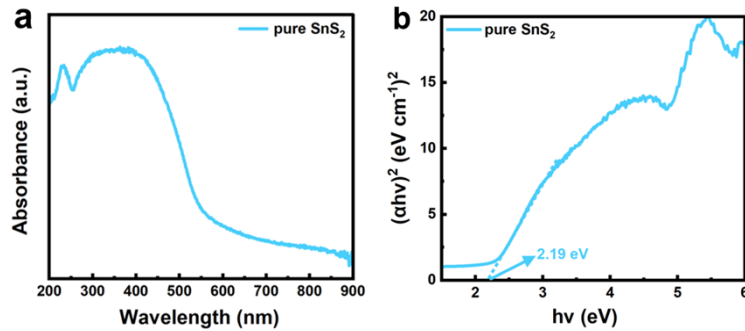

**Fig. S7.** (a) UV-vis absorption spectrum and (b) optical band gap of pure SnS<sub>2</sub>.

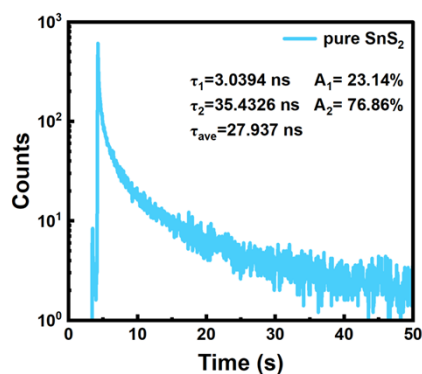

**Fig. S8.** Time-resolved transient photoluminescence decay spectra of the pure SnS<sub>2</sub> nanosheets.

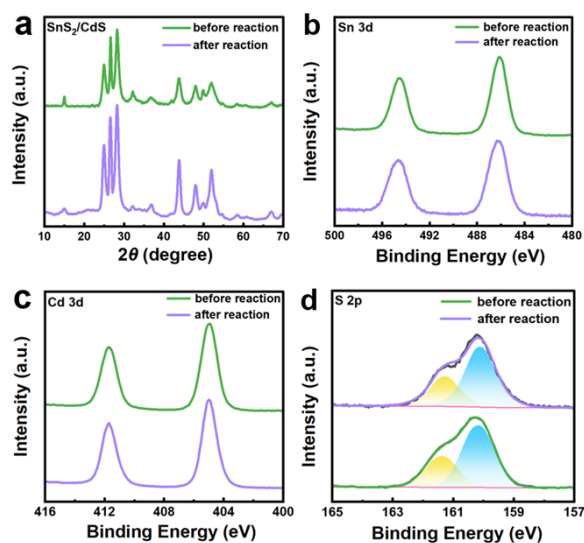

**Fig. S9.** (a) XRD pattern, (b) Sn 3d XPS peaks, (c) Cd 3d XPS peaks, and (d) S 2p XPS peaks of SnS<sub>2</sub>/CdS heterostructures before and after reaction.

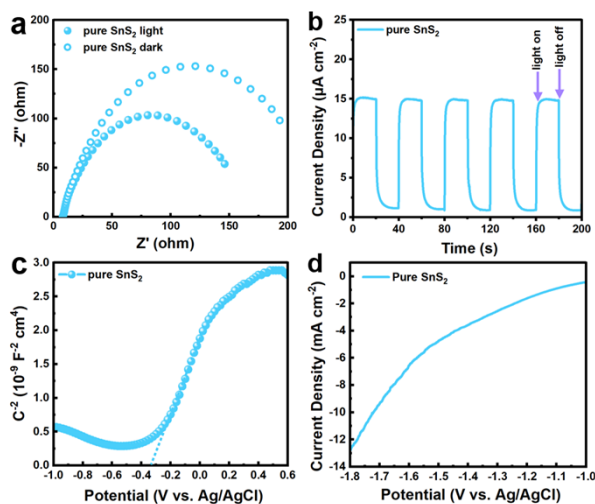

**Fig. S10.** (a) EIS Nyquist plots, (b) chronoamperometry curves, (c) Mott-Schottky plots, (d) linear sweep voltammogram curves of pure SnS<sub>2</sub> nanosheets.

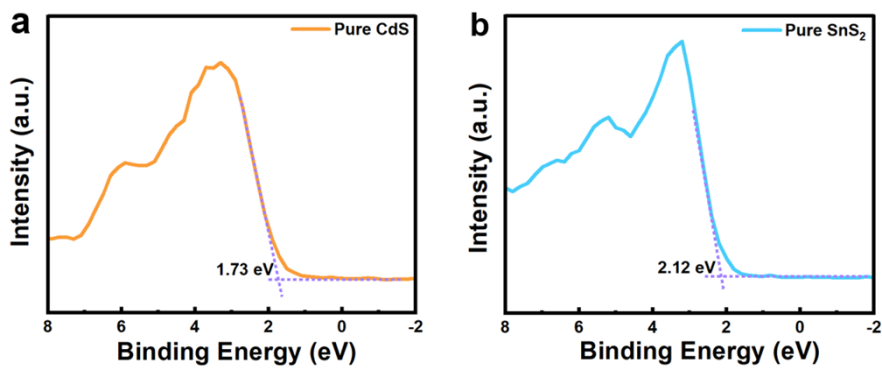

**Fig. S11.** XPS valance of (a) pure CdS and (b) pure SnS<sub>2</sub>.

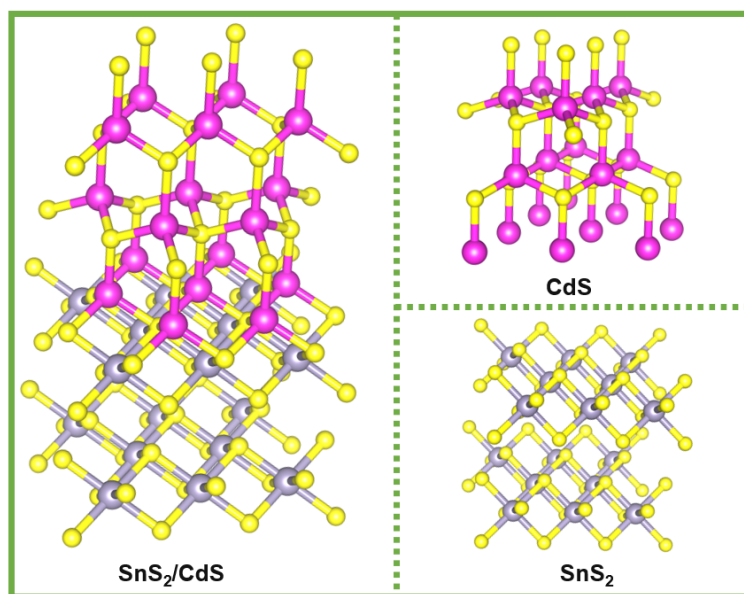

**Fig. S12.** models of CdS (002), SnS<sub>2</sub> (100), and SnS<sub>2</sub>/CdS heterostructures.

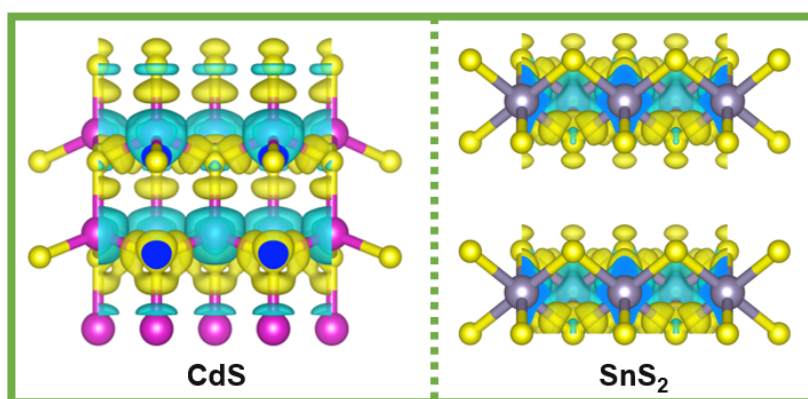

**Fig. S13.** charge density difference diagram of CdS (002), SnS<sub>2</sub> (100), and SnS<sub>2</sub>/CdS heterostructures.

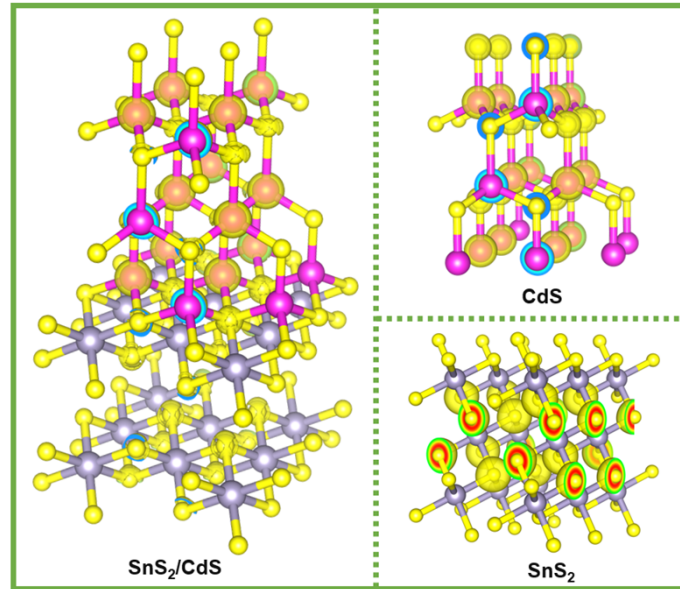

**Fig. S14.** charge density diagram of CdS (002), SnS<sub>2</sub> (100), and SnS<sub>2</sub>/CdS heterostructures.

**Table S1.** Time-resolved PL decay curve parameters obtained by double-exponential function simulation.

| samples               | $\tau_1$ (ns) | $\tau_2$ (ns) | $A_1$ (%) | $A_2$ (%) | $\tau_{ave}$ (ns) |
|-----------------------|---------------|---------------|-----------|-----------|-------------------|
| CdS                   | 0.8202        | 3.8416        | 67.53     | 32.47     | 1.80              |
| SnS <sub>2</sub> /CdS | 1.3303        | 3.7453        | 67.17     | 32.83     | 2.12              |
| SnS <sub>2</sub>      | 3.0394        | 35.4326       | 23.14     | 76.86     | 27.94             |

**Table S2.** Photocatalytic hydrogen production performance (AQE) of photocatalysts reported in literatures.

| Photocatalysts                | AQE (420 nm) | Noble metal | Sacrificial agent                                                   | Ref.             |
|-------------------------------|--------------|-------------|---------------------------------------------------------------------|------------------|
| CdS/RGO                       | 22.5%        | 0.5 wt% Pt  | 10 wt% lactic acid solution                                         | 1                |
| CdS/ZnS                       | 9.3%         | none        | 0.5 M Na <sub>2</sub> S and 0.5 M Na <sub>2</sub> SO <sub>3</sub>   | 2                |
| MoS <sub>2</sub> /CdS         | 14.7%        | none        | 10 wt% lactic acid solution                                         | 3                |
| CdS/TiO <sub>2</sub>          | 11.9%        | 0.5 wt% Pt  | 0.35 M Na <sub>2</sub> S and 0.25 M Na <sub>2</sub> SO <sub>3</sub> | 4                |
| FeP/CdS                       | 11.2%        | none        | 10 wt% lactic acid solution                                         | 5                |
| CuS/CdS                       | 19.7         | none        | 10 wt% lactic acid solution                                         | 6                |
| PtNi <sub>x</sub> /CdS        | 51.2%        | 2 wt% Pt    | 0.35 M Na <sub>2</sub> S and 0.25 M Na <sub>2</sub> SO <sub>3</sub> | 7                |
| CdS/WS <sub>2</sub> /graphene | 21.2%        | none        | 0.35 M Na <sub>2</sub> S and 0.25 M Na <sub>2</sub> SO <sub>3</sub> | 8                |
| Ni <sub>2</sub> P/MCdS-DETA   | 26.4%        | none        | 0.35 M Na <sub>2</sub> S and 0.25 M Na <sub>2</sub> SO <sub>3</sub> | 9                |
| CDs/CdS-S                     | 11.8%        | none        | 10 wt% lactic acid solution                                         | 10               |
| <b>SnS<sub>2</sub>/CdS</b>    | <b>59.3</b>  | <b>none</b> | <b>10 wt% lactic acid solution</b>                                  | <b>This work</b> |



## Reference

1. Q. Li, B. Guo, J. Yu, J. Ran, B. Zhang, H. Yan and J. Gong, Highly efficient visible-light-driven photocatalytic hydrogen production of CdS-cluster-decorated graphene nanosheets, *J. Am. Chem. Soc.*, 2011, **133**, 10878-10884.
2. Y. Lin, Q. Zhang, Y. Li, Y. Liu, K. Xu, J. Huang, X. Zhou and F. Peng, The evolution from a typical type-I CdS/ZnS to type-II and Z-scheme hybrid structure for efficient and stable hydrogen production under visible light, *ACS Sustainable Chem. Eng.*, 2020, **8**, 4537-4546.
3. A. Wu, C. Tian, Y. Jiao, Q. Yan, G. Yang and H. Fu, Sequential two-step hydrothermal growth of MoS<sub>2</sub>/CdS core-shell heterojunctions for efficient visible light-driven photocatalytic H<sub>2</sub> evolution, *Appl Catal B*, 2017, **203**, 955-963.
4. Z. Jiang, K. Qian, C. Zhu, H. Sun, W. Wan, J. Xie, H. Li, P. K. Wong and S. Yuan, Carbon nitride coupled with CdS-TiO<sub>2</sub> nanodots as 2D/0D ternary composite with enhanced photocatalytic H<sub>2</sub> evolution: A novel efficient three-level electron transfer process, *Appl Catal B*, 2017, **210**, 194-204.
5. K. Sun, J. Shen, Y. Yang, H. Tang and C. Lei, Highly efficient photocatalytic hydrogen evolution from 0D/2D heterojunction of FeP nanoparticles/CdS nanosheets, *Appl Surf Sci*, 2020, **505**, 144042.
6. F. Zhang, H. Q. Zhuang, W. Zhang, J. Yin, F. H. Cao and Y. X. Pan, Noble-metal-free CuS/CdS photocatalyst for efficient visible-light-driven photocatalytic H<sub>2</sub> production from water, *Catal. Today*, 2019, **330**, 203-208.
7. Q. Ba, X. Jia, L. Huang, X. Li, L. Gao and L. Mao, Hollow structured PtNi alloy as cocatalyst of CdS for hydrogen generation under visible light irradiation, *Int J Hydrogen Energy*, 2019, **44**, 28104-28112.
8. Q. Xiang, F. Cheng and D. Lang, Hierarchical layered WS<sub>2</sub>/graphene modified CdS nanorods for efficient photocatalytic hydrogen evolution, *ChemSusChem*, 2016, **9**, 996-1002.
9. T. Hu, K. Dai, J. Zhang, G. Zhu and C. Liang, Noble-metal-free Ni<sub>2</sub>P as cocatalyst decorated rapid microwave solvothermal synthesis of inorganic-organic CdS-DETA hybrids for enhanced photocatalytic hydrogen evolution, *Appl Surf Sci*, 2019, **481**, 1385-1393.
10. C. Zhu, C. Liu, Y. Fu, J. Gao, H. Huang, Y. Liu and Z. Kang, Construction of CDs/CdS photocatalysts for stable and efficient hydrogen production in water and seawater, *Appl Catal B*, 2019, **242**, 178-185.
